# Supplementary material for: Academic Values in a Controlled Regulatory Regime: A Case Study of Ghana’s Higher Education System
Source: Research Square preprint supplement (doi:10.21203/rs.3.rs-8495341/v1), 2026-02-20
Supplement: Supplementary file 1 [file 8d85af1cd79d815663aac5b1.docx]

|  |  |  |
| --- | --- | --- |
| Constitution of the Republic of Ghana (1992) | Article 21(1)(b) - General Fundamental Freedoms | All persons shall have the right to— (b) freedom of thought, conscience and belief, which shall include academic freedom |
| Education Regulatory Bodies Act, 2020 (Act 1023) | Section 2 - Objects (selection) | The objects of the Commission are to regulate tertiary education... (c) promote transparent governance and best practices...; (d) promote a culture of independent, life-long learning and of scientific and technological inquiry among staff, students and the wider society; |
| Education Regulatory Bodies Act, 2020 (Act 1023) | Section 7 - Regulatory functions (selection) | The regulatory functions of the Commission include to (a) ensure the implementation of approved regulations and national standards with respect to tertiary education institutions; (b) approve the establishment of tertiary education institutions; |
| GTEC Policy Guides on Credential Verification & Evaluation (Sept 2023) | Executive Summary / Policy proposal (selection) | All existing employees and newly hired staff of public agencies, organisations and institutions shall be made to: submit their local academic qualifications to the Ghana Tertiary Education Commission for verification; submit their foreign academic qualifications to the Ghana Tertiary Education Commission for credential evaluation. |
| GTEC Road Map to Accreditation | Institutional Accreditation procedures (selection) | Applicant Institution may... download and submit the GTEC Institutional Accreditation Questionnaire (GTEC/INFO A.2). Visit by GTEC Experts on physical and library facilities and assessment of the proposed institution’s financial sustainability within sixty (60) working days after payment. |
| Road Map: Presidential Charter requirements | Charter - thresholds | Institution must have operated under mentorship for not less than 10 years; At least 50% of the Academic Staff must have terminal degrees/qualification; At least 60% of each stratum in pyramidal structure must conform to GTEC norms for Academic Staff/Faculty. |
| GTEC Accreditation Questionnaires (Form A.3 - Programme Accreditation) | Programme accreditation checklist | The institution should justify the need for the new programme and also demonstrate how unique the programme is from existing ones or state if it is a new ... |
| GTEC Letter Addressed to all Heads of Tertiary Institutions, 21st October, 2025 | Non-recognition of doctor of business administration (dba) from swiss management Centre (smc) university and doctor of philosophy (PhD) from Universidad central de Nicaragua (ucn) | The Commission wishes to inform all Heads of Tertiary Institutions that it does not recognize the following qualifications: 1. The Doctor of Business Administration (DBA) awarded by Swiss Management Centre (SMC) University; and 2. The Doctor of Philosophy (PhD) jointly awarded by Universidad Central de Nicaragua (UCN) and Swiss Management Centre (SMC) University. Accordingly, any such qualifications obtained from the above-mentioned institutions are not recognized by the Ghana Tertiary Education Commission for academic or professional purposes. |
| GTEC Letter to All accredited Tertiary Institutions | Conversion of non-teaching staff to teaching staff | The attention of the Ghana Tertiary Education Commission (GTEC) has been drawn to reports indicating that some tertiary institutions have initiated the conversion of certain non-teaching staff into teaching faculty positions based on perceived equivalence of roles. In particular, it has been observed that some institutions are converting Senior Assistant Registrars to Senior Lecturers and Deputy Registrars to Associate Professors. While the Commission is not, in principle, opposed to conversions, it is important to note that any conversion beyond the rank of Lecturer (i.e., to Senior Lecturer, Associate Professor, or Professor) must first be submitted to the Commission for consideration and approval. Institutions are reminded that the requirements, responsibilities, and financial implications associated with teaching faculty positions differ significantly from those of non-teaching administrative roles. Furthermore, the Commission has also observed that some institutions are using professional doctorates such as the Doctor of Business Administration (DBA)-as the basis for academic progression or promotion to senior academic ranks, including Associate Professor and Professor. The Commission wishes to emphasize that a professional! Doctorate does not constitute a terminal ‘academic degree for purposes JUSTICE of academic assignments and promotions. Accordingly, all Heads of Institutions are hereby advised to desist from such practices and to ensure that promotions and progressions within the academic ranks are based solely on the possession and verification of a valid terminal academic degree awarded by an institution recognized by GTEC. The Commission counts on the continued cooperation of all institutions in upholding the standards of academic progression and safeguarding the integrity of the tertiary education system. |
| GTEC Letter to all Public Tertiary Institutions 03/11/25 | 2025/2026 Academic Year Fees | The Ghana Tertiary Education Commission (GTEC) has noted that public tertiary education institutions have, over the years, reviewed student fees without adhering to proper procedures, causing implementation difficulties.  To ensure compliance with statutory requirements under the Fees and Charges Act and in line with its mandate to promote the effective and efficient operation of tertiary education institutions, GTEC reminds all universities that new fees for the 2025/2026 academic year cannot be charged without prior approval from Parliament, as mandated by law. Vice Chancellors are hereby reminded to maintain the current student fees and only implement  the revised fees for the 2025/2026 academic year after obtaining approval from Parliament. We count on your cooperation. |
| GTEC Letter to the Management of the University of Cape Coast | GTEC directs UCC Vice-Chancellor to step aside over retirement age | he Ghana Tertiary Education Commission (GTEC) has directed Professor Johnson Nyarko Boampong to vacate his position as Vice-Chancellor of the University of Cape Coast (UCC), citing his stay in office beyond the compulsory retirement age of 60.Ghana travel guide  In a letter dated Friday, September 19, 2025, GTEC noted that Prof. Boampong’s continued occupancy of the role violates Article 199(1) of the 1992 Constitution, which stipulates that public officers must retire at age 60 unless otherwise provided.  “The Office of the Vice-Chancellor, being an office established under Section 7(1) of the University of Cape Coast Act, 1992 (PNDCL 278), is a public office under the meaning and intendment of Article 199(1). Hence, anyone acting in the office of the Vice-Chancellor is presumptively mandated to proceed on compulsory retirement upon attaining 60 years,” the letter stated.  GTEC also referenced the University of Cape Coast Statutes (2016), which set the Vice-Chancellor’s tenure at an initial four years, renewable for an additional three years, provided the statutory retirement age is not exceeded. In the interim, GTEC has directed that Pro-Vice-Chancellor, Professor Denis Worlanyo Aheto, should act as Vice-Chancellor.  The Commission acknowledged that the matter is currently before the Cape Coast High Court and has, therefore, instructed the UCC Governing Council to halt the appointment of a substantive Vice-Chancellor until the case is determined. |
| GTEC Letter to C. K. Tedam University of Technology and Applied Sciences. 01/09/25 | GTEC directs CKT-UTAS to clarify or withdraw Dr. Akoriyea’s ‘Professor’ title | The Ghana Tertiary Education Commission (GTEC) has formally directed the C.K. Tedam University of Technology and Applied Sciences (CKT-UTAS) in Navrongo to withdraw or clarify the academic appointment of Dr. Samuel Kaba Akoriyea, the Director-General of the Ghana Health Service (GHS), following a public petition challenging his use of the title “Professor. “Ghana travel guide  In a letter dated September 1, 2025, and signed by the Deputy Director-General, Professor Augustine Ocloo, GTEC acknowledged receiving a complaint concerning the legitimacy of Dr. Akoriyea’s academic designation.  The Commission emphasised that Dr. Akoriyea’s appointment as a Part-Time Lecturer (Associate Professor) is a non-tenured, temporary role typically reserved for industry professionals brought in for limited academic engagements.  According to GTEC, such appointments “do not carry the permanency, responsibilities, or entitlements” of substantive academic ranks and therefore do not warrant the use of the title “Professor.” “In light of the above, the Commission hereby directs the University to either withdraw the appointment or formally communicate to Dr. Akoriyea that the appointment was for a single term, non-tenured, and does not entitle him to use the title ‘Professor,’” the letter stated. The Commission has instructed the university to comply with this directive and submit evidence of compliance by September 15, 2025. The letter has been copied to Dr. Samuel Kaba Akoriyea and the Director-General of the Ghana Health Service. This development highlights ongoing efforts by GTEC to uphold academic integrity and standardize the use of academic titles within Ghana’s tertiary education landscape. |
| GTEC Directives and guidelines on admissions into Tertiary Institutions. |  |  |
|  |  |  |
